# Supplementary material for: Adsorption Effect and Adsorption Mechanism of High Content Zeolite Ceramsite on Asphalt VOCs
Source: MDPI journal article supplement (doi:10.3390/ma15176100), 2022-09-02
Supplement: s1 [file s1]

**Table S1** Main substances of asphalt VOCs

| Number | Time/min | Substance                                                             | Suitability | Peak area |
|--------|----------|-----------------------------------------------------------------------|-------------|-----------|
| 1      | 3.776    | C <sub>5</sub> H <sub>12</sub> (Pentane)                              | 91          | 96557055  |
| 2      | 4.535    | C <sub>3</sub> H <sub>6</sub> O (Acetone)                             | 72          | 16961015  |
| 3      | 5.179    | C <sub>6</sub> H <sub>14</sub> (2-Methylpentane)                      | 91          | 121377299 |
| 4      | 5.733    | C <sub>6</sub> H <sub>12</sub> (1-Hexene)                             | 93          | 154499780 |
| 5      | 5.840    | C <sub>6</sub> H <sub>14</sub> (Hexane)                               | 94          | 342175671 |
| 6      | 6.486    | C <sub>4</sub> H <sub>8</sub> O (Butanal)                             | 95          | 67262589  |
| 7      | 6.710    | C <sub>4</sub> H <sub>8</sub> O (2-Butanone)                          | 86          | 31286879  |
| 8      | 7.486    | C <sub>7</sub> H <sub>16</sub> (3-Methylhexane)                       | 94          | 65190116  |
| 9      | 7.671    | C <sub>6</sub> H <sub>6</sub> (Benzene)                               | 95          | 22157001  |
| 10     | 7.887    | C <sub>7</sub> H <sub>14</sub> (1-Heptene)                            | 97          | 53312432  |
| 11     | 7.993    | C <sub>7</sub> H <sub>16</sub> (Heptane)                              | 91          | 187110400 |
| 12     | 8.739    | C <sub>5</sub> H <sub>10</sub> O (Pentanal)                           | 86          | 23500469  |
| 13     | 9.368    | C <sub>8</sub> H <sub>18</sub> (2-Methylheptane)                      | 97          | 50998377  |
| 14     | 9.585    | C <sub>2</sub> H <sub>6</sub> S <sub>2</sub> (Dimethyl disulfide)     | 98          | 7286575   |
| 15     | 9.898    | C <sub>7</sub> H <sub>8</sub> (Toluene)                               | 95          | 23769018  |
| 16     | 11.391   | C <sub>3</sub> H <sub>8</sub> S <sub>2</sub> (Methyl ethyl disulfide) | 94          | 7815323   |
| 17     | 11.886   | C <sub>8</sub> H <sub>10</sub> (1,3-Dimethylbenzene)                  | 97          | 14304660  |
| 18     | 12.387   | C <sub>8</sub> H <sub>10</sub> (O-Xylene)                             | 95          | 7325838   |
| 19     | 14.106   | C <sub>9</sub> H <sub>12</sub> (1,3,5-Trimethylbenzene)               | 97          | 10787637  |
| 20     | 15.040   | C <sub>10</sub> H <sub>14</sub> (M-Cymene)                            | 95          | 9376666   |
| 21     | 15.224   | C <sub>11</sub> H <sub>24</sub> (Undecane)                            | 94          | 83552010  |
| 22     | 15.439   | C <sub>10</sub> H <sub>14</sub> (O-Cymene)                            | 95          | 17577964  |
| 23     | 15.540   | C <sub>10</sub> H <sub>14</sub> (1-Ethyl-2,3-dimethylbenzene)         | 96          | 8484848   |
| 24     | 16.129   | C <sub>10</sub> H <sub>14</sub> (1,2,4,5-Tetramethylbenzene)          | 91          | 45555904  |
| 25     | 16.492   | C <sub>10</sub> H <sub>12</sub> (2-Methyl-3-phenyl-1-propene)         | 91          | 17483172  |
| 26     | 16.636   | C <sub>12</sub> H <sub>24</sub> (1-Dodecene)                          | 98          | 45323679  |
| 27     | 16.691   | C <sub>12</sub> H <sub>26</sub> (Dodecane)                            | 96          | 306384349 |
| 28     | 16.895   | C <sub>13</sub> H <sub>28</sub> (2,6-Dimethylundecane)                | 96          | 102752304 |
| 29     | 17.536   | C <sub>10</sub> H <sub>8</sub> (Naphthalene)                          | 95          | 365668351 |
| 30     | 18.013   | C <sub>14</sub> H <sub>28</sub> (1-Tetradecene)                       | 98          | 70566200  |
| 31     | 18.060   | C <sub>13</sub> H <sub>28</sub> (Tridecane)                           | 97          | 455454268 |
| 32     | 18.207   | C <sub>14</sub> H <sub>28</sub> (E-3-Tetradecene)                     | 90          | 150607906 |
| 33     | 18.889   | C <sub>14</sub> H <sub>30</sub> (2-Methyltridecane)                   | 90          | 112366936 |
| 34     | 19.084   | C <sub>11</sub> H <sub>10</sub> (1-Methylnaphthalene)                 | 94          | 350629632 |
| 35     | 19.393   | C <sub>14</sub> H <sub>30</sub> (n-Tetradecane)                       | 98          | 711859339 |
| 36     | 20.292   | C <sub>15</sub> H <sub>32</sub> (4-Methyltetradecane)                 | 92          | 205359155 |
| 37     | 20.369   | C <sub>15</sub> H <sub>32</sub> (2,6,11-Trimethyldodecane)            | 90          | 260178985 |
| 38     | 20.446   | C <sub>14</sub> H <sub>28</sub> O (Tetradecanal)                      | 83          | 44179919  |
| 39     | 20.609   | C <sub>12</sub> H <sub>12</sub> (2-Ethylnaphthalene)                  | 93          | 91955162  |
| 40     | 20.831   | C <sub>12</sub> H <sub>12</sub> (2,6-Dimethylnaphthalene)             | 98          | 265363451 |
| 41     | 21.005   | C <sub>15</sub> H <sub>32</sub> (n-Pentadecane)                       | 98          | 633418600 |
| 42     | 21.130   | C <sub>12</sub> H <sub>12</sub> (2,3-Dimethylnaphthalene)             | 98          | 229617912 |
| 43     | 21.204   | C <sub>12</sub> H <sub>12</sub> (2,7-Dimethylnaphthalene)             | 97          | 271912811 |
